# Supplementary material for: Structure and bonding in Au(i) chloride species: a critical examination of X-ray absorption spectroscopy (XAS) data
Source: Royal Society of Chemistry journal article supplement (doi:10.1039/c4ra13087a), 2014-12-16
Supplement: c4ra13087a1.pdf [file c4ra13087a1.pdf]

## Supporting information

### Structure and Bonding in Au(I) Chloride Species: A Critical Examination of X-ray Absorption Spectroscopy (XAS) Data

Sin-Yuen Chang, Akihiro Uehara, Samuel G. Booth, Konstantin Ignatyev, J. Frederick W. Mosselmans, Robert A. W. Dryfe, and Sven L. M. Schroeder

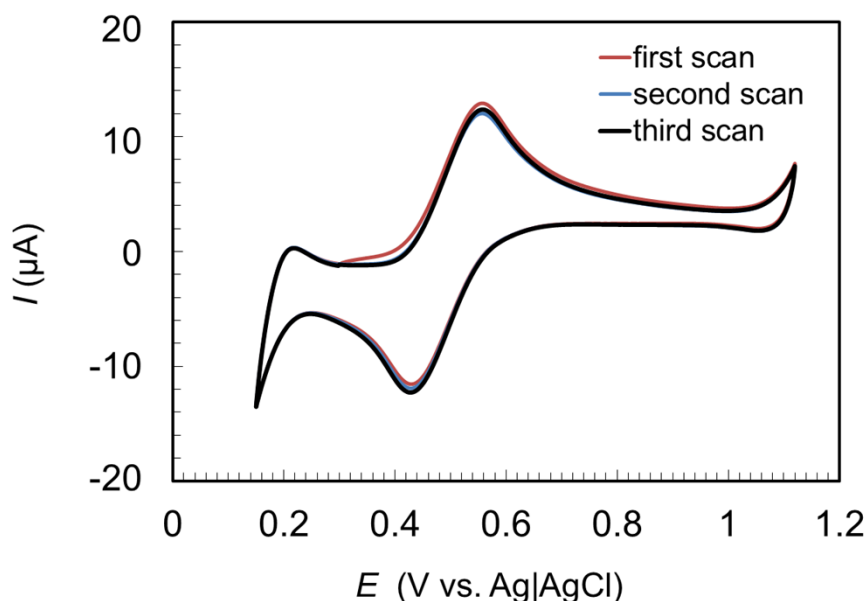

Figure S1. Cyclic voltammogram of  $[\text{AuCl}_2]^-$  transferring across a water/1,2-dichlorobenzene interface at a scanning rate of 10 mV/s.

Negligible changes in voltammogram after three scans shows that  $[\text{AuCl}_2]^-$  is stable in 1,2-dichlorobenzene. The electrochemical cell contains two immiscible phases: water and 1,2-dichlorobenzene. The aqueous phase containing 0.25 mM tetraoctylammonium- $[\text{AuCl}_2]$  and 0.01 M HCl; 1,2-dichlorobenzene phase contained 10 mM BTPPA+TFPB<sup>-</sup> (bis(triphenylphosphoranylidene) ammonium cation, tetrakis[3,5-bis(trifluoromethyl)phenyl]borate anion). Experimental details are given in Uehara et al.<sup>1</sup>

1. A. Uehara, T. Hashimoto and R. A. W. Dryfe, *Electrochim. Acta*, 2014, **118**, 26-32.
